# Supplementary material for: Construction of Ketoenamine-Based Covalent Organic Frameworks with Electron-Rich Sites for Efficient and Rapid Removal of Iodine from Solution
Source: MDPI journal article supplement (doi:10.3390/molecules28248151), 2023-12-18
Supplement: s1 [file s1]

**Supporting Information**

**Contents**

**1    Supporting Figures.....2**

**2    Supporting Tables.....12**

**References .....21**

# 1 Supporting Figures

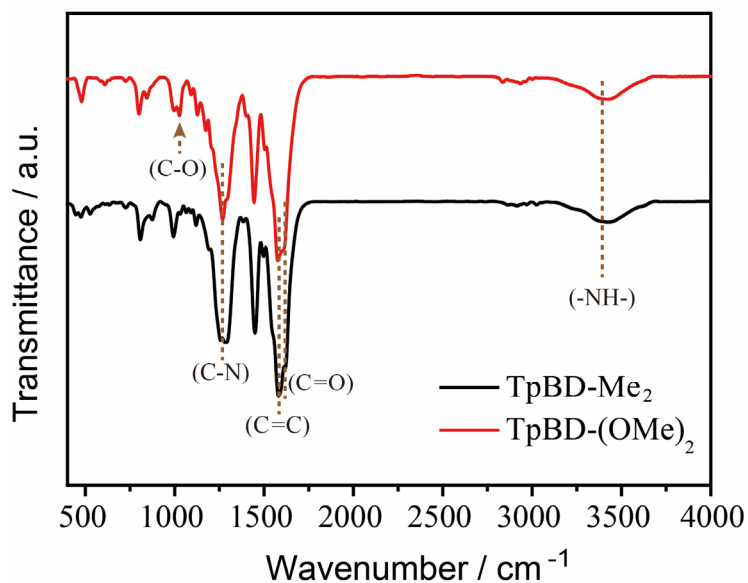

**Figure S1** The FT-IR spectra of TpBD-Me<sub>2</sub> and TpBD-(OMe)<sub>2</sub> and the characteristic peaks are marked on the photos.

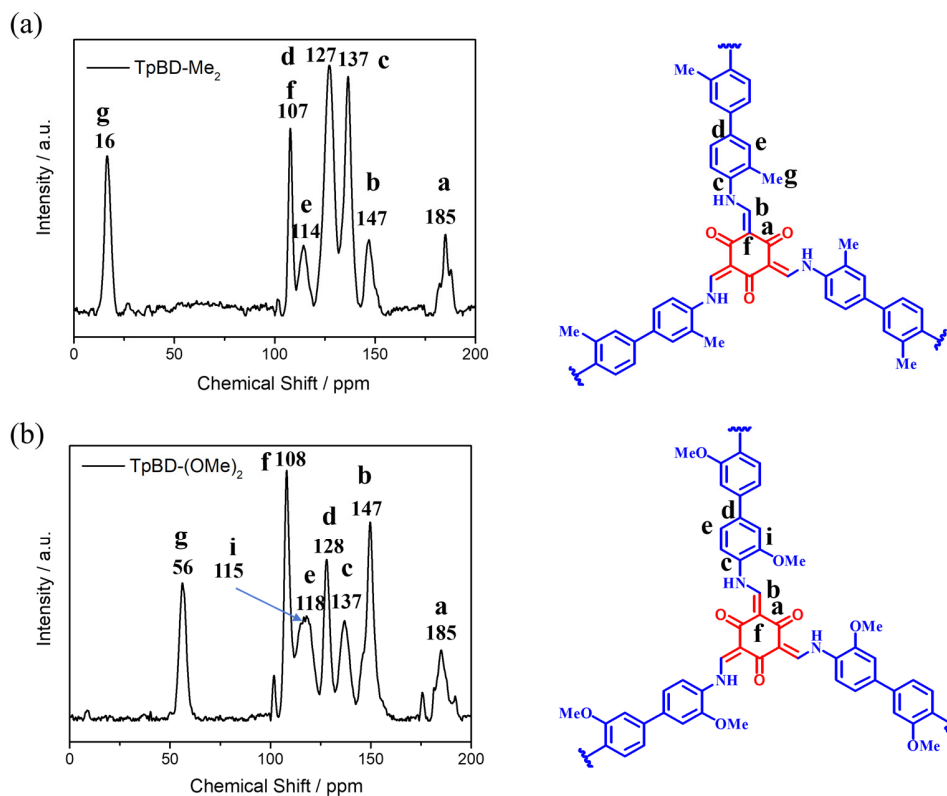

**Figure S2** Solid-state <sup>13</sup>C CP-MAS NMR spectra of TpBD-Me<sub>2</sub> (a) and TpBD-(OMe)<sub>2</sub> (b), in which the chemical shifts of carbon in different environments are marked in the photos.

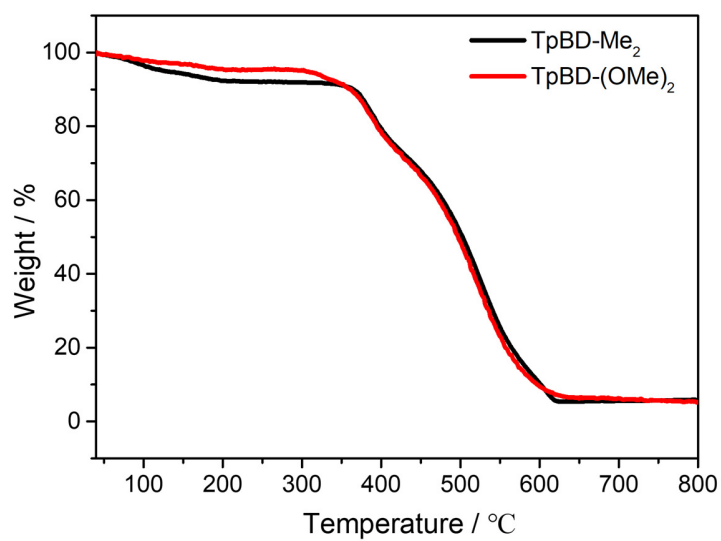

**Figure S3** Thermogravimetric analysis (TGA) profiles of TpBD-Me<sub>2</sub> and TpBD-(OMe)<sub>2</sub> obtained in the temperature range from 25°C to 800°C.

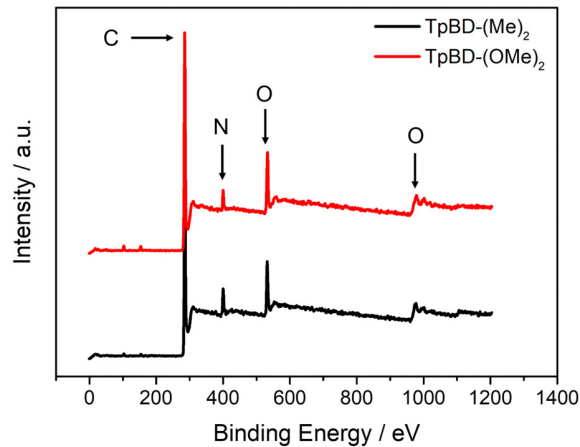

**Figure S4** XPS spectra of TpBD-Me<sub>2</sub> (black), TpBD-(OMe)<sub>2</sub> (red), in which the peaks of C, O and N are marked with arrows.

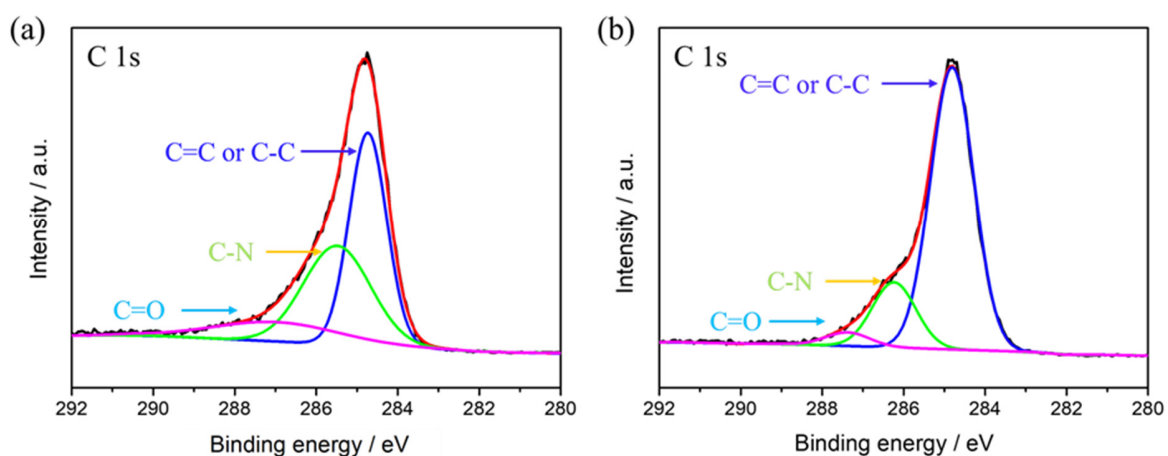

**Figure S5** High-resolution XPS spectra of C1s for TpBD-Me<sub>2</sub> (a) and TpBD-(OMe)<sub>2</sub> (b), which can be divided into three different carbon environments.

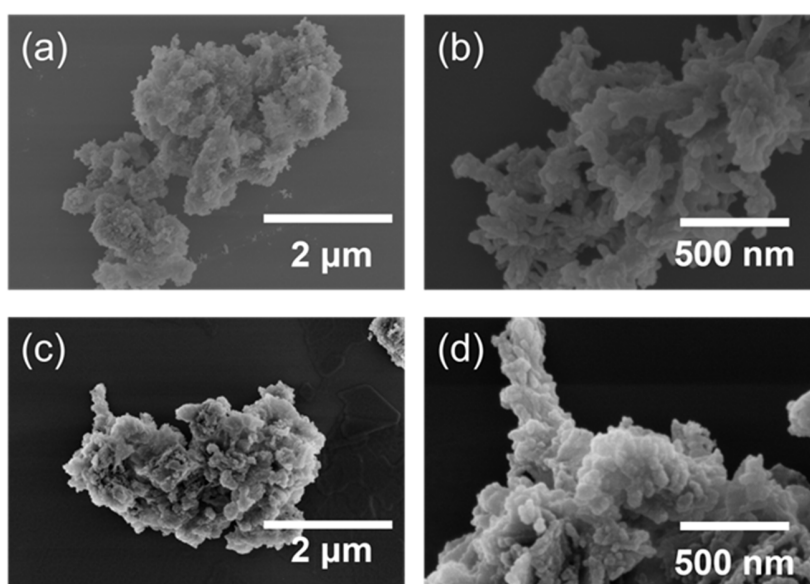

**Figure S6** Low (a,c) and high (b,d) magnification SEM images of TpBD-Me<sub>2</sub> (a,b) and TpBD-(OMe)<sub>2</sub> (c,d) powders.

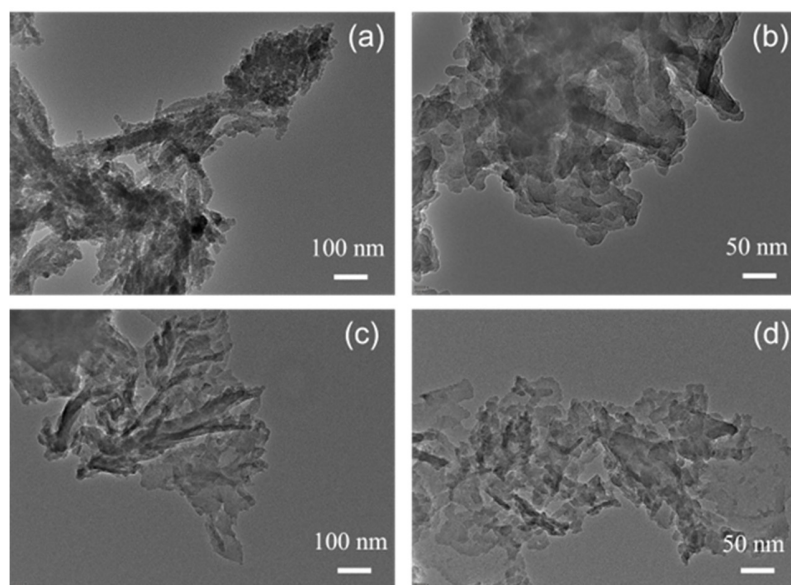

**Figure S7** The TEM images of TpBD-Me<sub>2</sub> (a,b) and TpBD-(OMe)<sub>2</sub> (c,d) powders with different magnifications.

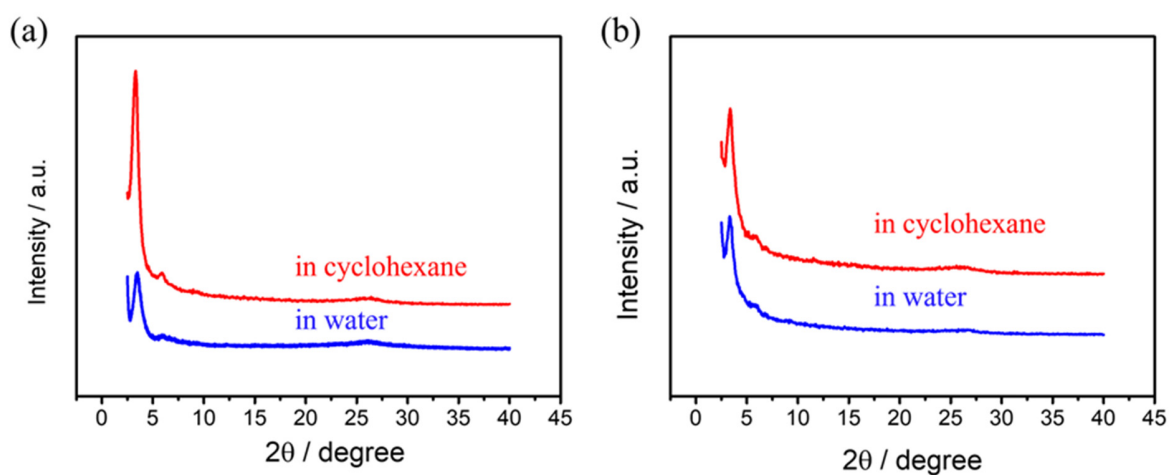

**Figure S8** PXRD patterns of TpBD-Me<sub>2</sub> (a) and TpBD-(OMe)<sub>2</sub> (b) powders immersing in water and cyclohexane for two weeks without refreshing solvent. Prior to PXRD measurements, the samples were separated via filtration and followed by drying under vacuum at 100°C for 48 hours.

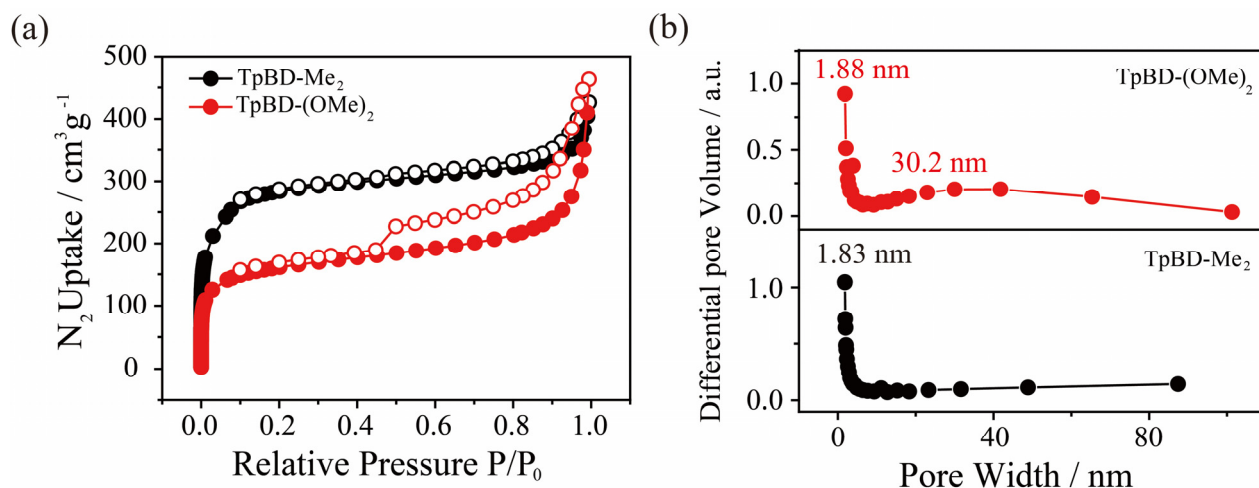

**Figure S9** (a) Nitrogen adsorption-desorption isotherms curves of TpBD-Me<sub>2</sub> and TpBD-(OMe)<sub>2</sub> (filled circles: adsorption, open circles: desorption) (b) The pore size distribution of TpBD-Me<sub>2</sub> and TpBD-(OMe)<sub>2</sub>.

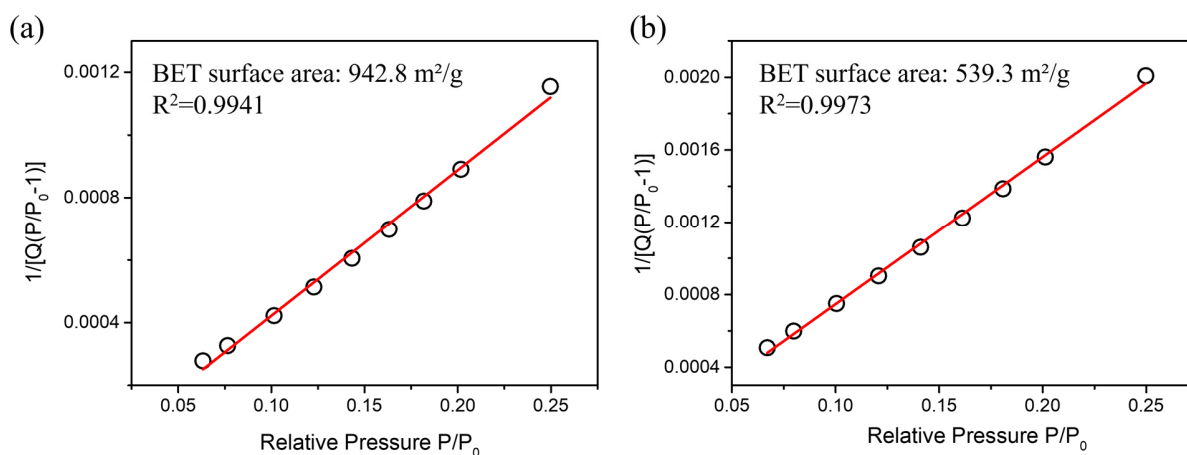

**Figure S10** Plots of BET surface area of TpBD-Me<sub>2</sub> (a) and TpBD-(OMe)<sub>2</sub> (b) obtained by in the range of relative pressure 0-0.25 and the calculated value of the specific surface area and the values of R<sup>2</sup> for linear fitting are marked on the photos.

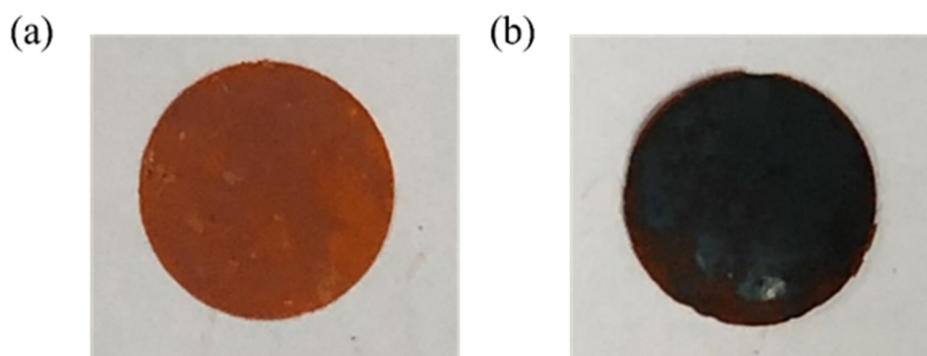

**Figure S11** Photos of as-prepared disk-shaped sheet of TpBD-Me<sub>2</sub> (a) and TpBD-(OMe)<sub>2</sub> (b) which were obtained by pressing the powders with a tablet press at a pressure of 10 MPa for 1 minute.

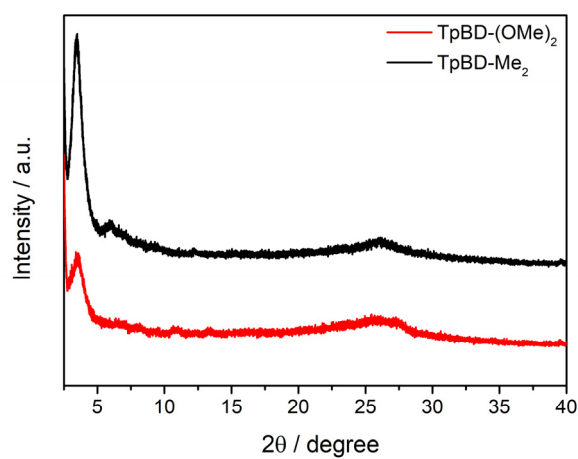

**Figure S12** PXRD patterns of as-prepared TpBD-Me<sub>2</sub> and TpBD-(OMe)<sub>2</sub> sheets after being pressed at a pressure of 10 MPa.

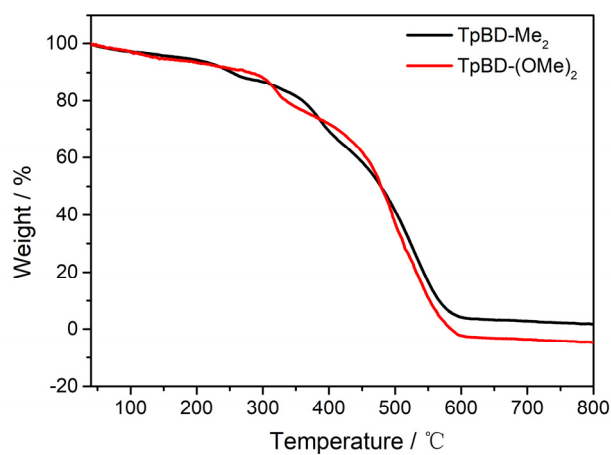

**Figure S13** Thermogravimetric analysis (TGA) profiles of TpBD-Me<sub>2</sub> and TpBD-(OMe)<sub>2</sub> sheets after being pressed at a pressure of 10 MPa.

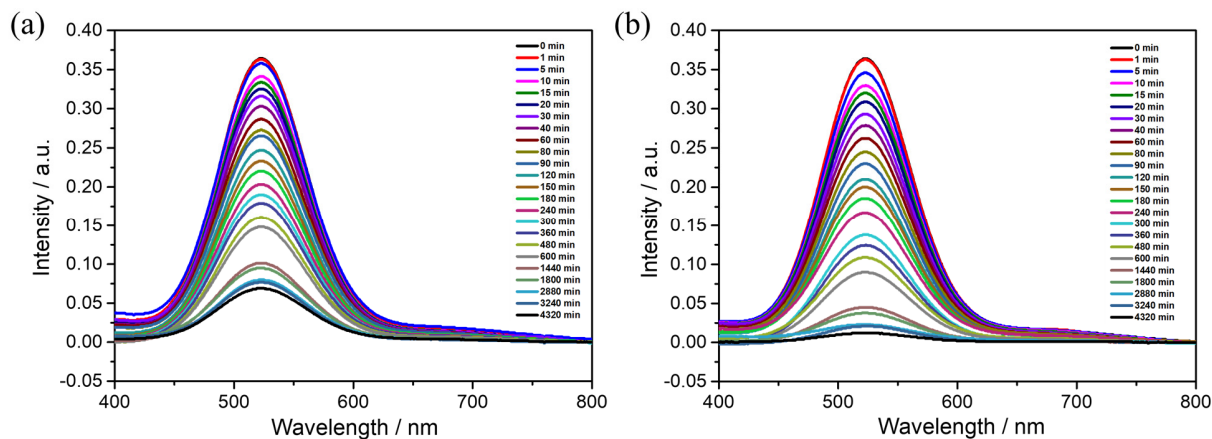

**Figure S14** Temporal absorption spectral evolution of 10 mL of cyclohexane solution of I<sub>2</sub> at the initial concentration of 100.25 mg·L<sup>-1</sup> recorded after 10 mg of TpBD-Me<sub>2</sub> (a) TpBD-(OMe)<sub>2</sub> (b) are placed inside.

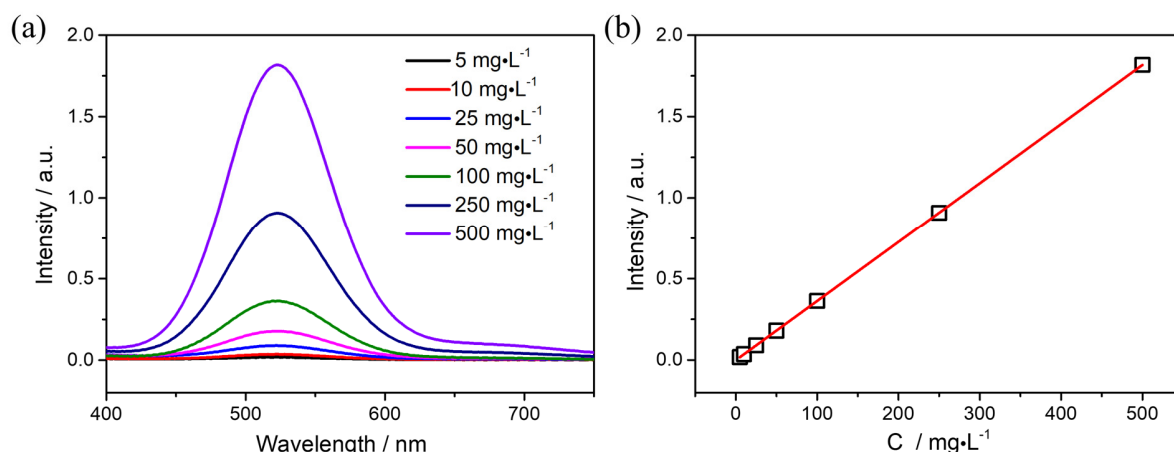

**Figure S15** (a) UV-Vis spectra of cyclohexane solutions of I<sub>2</sub> at different concentration ranging from 5, to 10, 25, 50, 100, 250 and 500 mg·L<sup>-1</sup>. (b) Plot of the absorption intensity of I<sub>2</sub> at about 520 nm versus the I<sub>2</sub> concentration (C, mg·L<sup>-1</sup>) in cyclohexane, which can be fitted according to a linear function of Intensity = 0.00364 - 0.0009065C with r<sup>2</sup> of 0.9999.



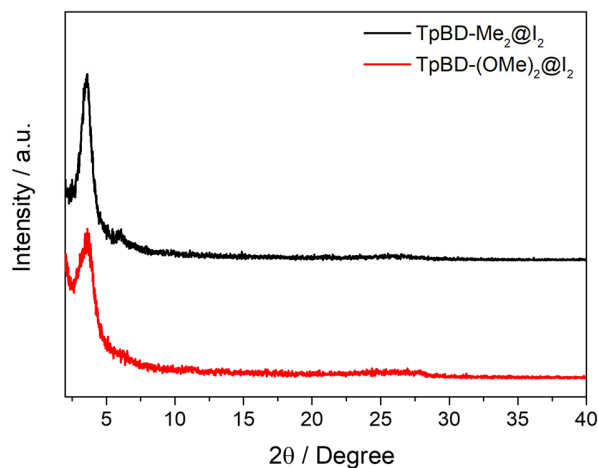

**Figure S16** PXRD patterns of TpBD-Me<sub>2</sub>@I<sub>2</sub> (black) and TpBD-(OMe)<sub>2</sub>@I<sub>2</sub> (red) after I<sub>2</sub> adsorption in cyclohexane at initial concentration of 100 mg·L<sup>-1</sup>.

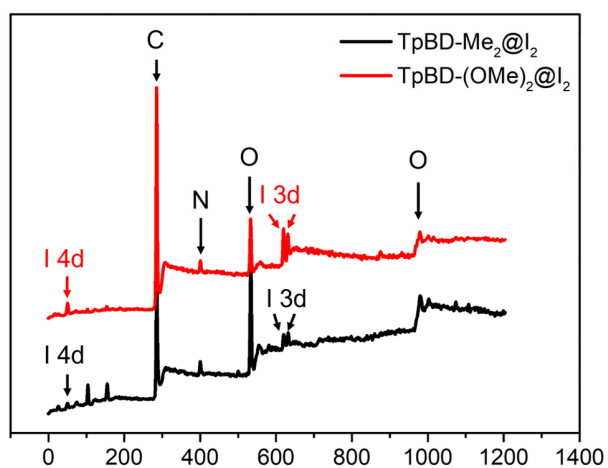

**Figure S17** XPS spectra of TpBD-Me<sub>2</sub>@I<sub>2</sub> and TpBD-(OMe)<sub>2</sub>@I<sub>2</sub> obtained by 72 h adsorption of TpBD-Me<sub>2</sub> and TpBD-(OMe)<sub>2</sub> in the cyclohexane solutions of I<sub>2</sub> at 500 mg·L<sup>-1</sup>.

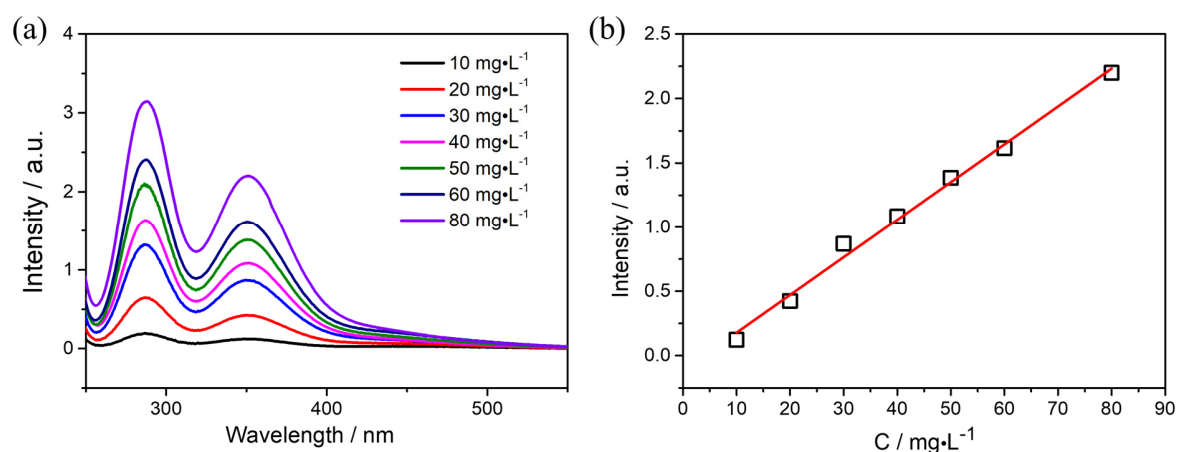

**Figure S18** (a) UV-vis spectra of  $I_3^-$  aqueous solution (a mixture of KI and  $I_2$  in the mole ratio of 5:1) at concentration ranging from 10, to 20, 30, 40, 50, 60 and 80  $mg \cdot L^{-1}$  of  $I_2$ . (b) Plot of the absorbance intensity of  $I_3^-$  aqueous solution at 350 nm ( $I_{350}$ ) versus  $I_2$  concentration, which can be well fitted by a linear function,  $I_{350} = 0.02935C_{I_2} - 0.1156$  with  $r^2 = 0.992$ .

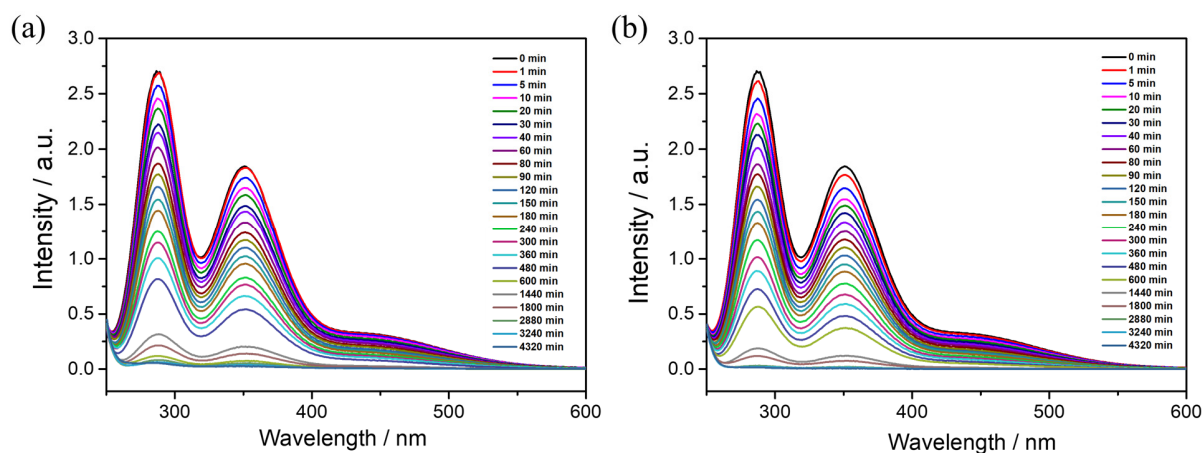

**Figure S19** Temporal absorption spectral evolution of 10 mL aqueous solution of  $I_2$ /KI at the initial concentration of 66.67  $mg \cdot L^{-1}$  of  $I_2$ . recorded after 5 mg of TpBD-Me<sub>2</sub>(a) TpBD-(OMe)<sub>2</sub>(b) are placed inside.

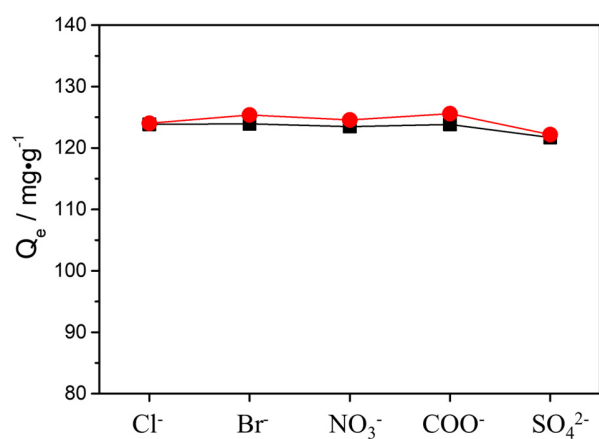

**Figure S20** Plot of the values of  $Q_e$  of TpBD-Me<sub>2</sub> (black square) and TpBD-(OMe)<sub>2</sub> (red circle) in the presence of different kinds of competing anions, in which I<sub>2</sub> adsorption is carried out at the initial concentration of 67 mg·L<sup>-1</sup> of I<sub>2</sub> in KI/I<sub>2</sub> aqueous solution.

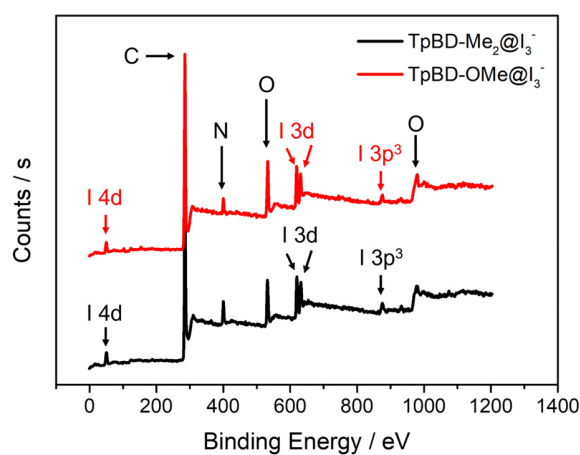

**Figure S21** XPS spectra of TpBD-Me<sub>2</sub>@I<sub>3</sub><sup>-</sup> (black) and TpBD-(OMe)<sub>2</sub>@I<sub>3</sub><sup>-</sup> obtained by 72 h adsorption of TpBD-Me<sub>2</sub> and TpBD-(OMe)<sub>2</sub> in the I<sub>3</sub><sup>-</sup> aqueous solution (a mixture of KI and I<sub>2</sub> in the mole ratio of 5:1) at the presence of 200 mg·L<sup>-1</sup> of I<sub>2</sub>.

## 2 Supporting Tables

**Table S1** Summary of C, N, O atomic concentration of TpBD-Me<sub>2</sub> and TpBD-(OMe)<sub>2</sub> derived from the results of survey XPS spectra in Figure S4.

| COFs                    | C      | O      | N     |
|-------------------------|--------|--------|-------|
| TpBD-Me <sub>2</sub>    | 81.11% | 10.49% | 8.40% |
| TpBD-(OMe) <sub>2</sub> | 82.69% | 11.87% | 5.44% |

**Table S2** Summary of the BET fitting results of nitrogen adsorption isotherms of TpBD-Me<sub>2</sub> and TpBD-(OMe)<sub>2</sub>.

| COFs                    | Surface areas / m <sup>2</sup> ·g <sup>-1</sup> | Pore volume / cm <sup>3</sup> ·g <sup>-1</sup> | Pore diameter / nm |
|-------------------------|-------------------------------------------------|------------------------------------------------|--------------------|
| TpBD-Me <sub>2</sub>    | 942.81                                          | 0.66                                           | 1.83               |
| TpBD-(OMe) <sub>2</sub> | 539.30                                          | 0.72                                           | 1.88               |

**Table S3** Summary of the values of  $q_t$ ,  $q_t^{uc}$  and  $q_t^{Mol}$  of TpBD-Me<sub>2</sub> and TpBD-(OMe)<sub>2</sub> obtained during 72 h (4320 min) adsorption of I<sub>2</sub> in cyclohexane.

| Time<br>/ min | TpBD-Me <sub>2</sub>              |                                         |             | TpBD-(OMe) <sub>2</sub>           |                                         |             |
|---------------|-----------------------------------|-----------------------------------------|-------------|-----------------------------------|-----------------------------------------|-------------|
|               | $q_t/\text{mg}\cdot\text{g}^{-1}$ | $q_t^{uc}/\text{g}\cdot\text{mol}^{-1}$ | $q_t^{Mol}$ | $q_t/\text{mg}\cdot\text{g}^{-1}$ | $q_t^{uc}/\text{g}\cdot\text{mol}^{-1}$ | $q_t^{Mol}$ |
| 1             | 0.28                              | 0.27                                    | 0.00105     | 0.28                              | 0.29                                    | 0.00115     |
| 5             | 1.65                              | 1.57                                    | 0.00617     | 4.95                              | 5.17                                    | 0.0204      |
| 10            | 6.32                              | 6.00                                    | 0.0236      | 9.34                              | 9.76                                    | 0.0385      |
| 15            | 8.24                              | 7.82                                    | 0.0308      | 12.09                             | 12.64                                   | 0.0498      |
| 20            | 10.72                             | 10.17                                   | 0.0401      | 15.11                             | 15.79                                   | 0.0622      |
| 30            | 13.19                             | 12.52                                   | 0.0493      | 19.51                             | 20.39                                   | 0.0803      |
| 40            | 16.76                             | 15.91                                   | 0.0627      | 23.35                             | 24.40                                   | 0.0962      |
| 60            | 21.15                             | 20.07                                   | 0.0791      | 28.02                             | 29.29                                   | 0.115       |
| 80            | 25.00                             | 23.73                                   | 0.0935      | 32.69                             | 34.17                                   | 0.135       |
| 90            | 27.20                             | 25.82                                   | 0.102       | 36.81                             | 38.47                                   | 0.152       |
| 120           | 32.14                             | 30.51                                   | 0.120       | 42.31                             | 44.22                                   | 0.172       |
| 150           | 35.99                             | 34.16                                   | 0.135       | 45.06                             | 47.09                                   | 0.186       |
| 180           | 39.56                             | 37.55                                   | 0.148       | 49.18                             | 51.40                                   | 0.203       |
| 240           | 44.23                             | 41.98                                   | 0.165       | 54.12                             | 56.56                                   | 0.223       |
| 300           | 47.80                             | 45.37                                   | 0.179       | 62.09                             | 64.89                                   | 0.256       |
| 360           | 50.83                             | 48.25                                   | 0.190       | 65.66                             | 68.62                                   | 0.270       |

|      |       |       |       |       |       |       |
|------|-------|-------|-------|-------|-------|-------|
| 480  | 55.77 | 52.93 | 0.209 | 70.06 | 73.22 | 0.289 |
| 600  | 59.34 | 56.32 | 0.222 | 75.28 | 78.68 | 0.310 |
| 1440 | 72.25 | 68.58 | 0.270 | 87.65 | 91.61 | 0.361 |
| 1800 | 73.90 | 70.14 | 0.276 | 89.56 | 93.60 | 0.369 |
| 2880 | 78.02 | 74.05 | 0.292 | 93.68 | 97.91 | 0.386 |
| 3240 | 78.85 | 74.84 | 0.295 | 94.23 | 98.48 | 0.388 |
| 4320 | 80.77 | 76.66 | 0.302 | 95.61 | 99.93 | 0.394 |

**Table S4** Summary of the experimental values of  $q_e$  (exp.  $q_e$ ) of TpBD-Me<sub>2</sub> and TpBD-(OMe)<sub>2</sub> obtained by 72 h adsorption of I<sub>2</sub> in cyclohexane at initial concentration of 100.25 mg·L<sup>-1</sup> and the calculated value of  $q_e$  (cal.  $q_e$ ) from fitting of their adsorption kinetics profiles according to pseudo-first-order or pseudo-second-order models. The kinetic parameters obtained by fitting according to pseudo-first-order or pseudo-second-order models are also listed in the Table S4.

| COFs                    | exp. $q_e$<br>/mg·g <sup>-1</sup> | Pseudo-first-order model          |                          |                | Pseudo-second-order model         |                                                  |                |
|-------------------------|-----------------------------------|-----------------------------------|--------------------------|----------------|-----------------------------------|--------------------------------------------------|----------------|
|                         |                                   | cal. $q_e$<br>/mg·g <sup>-1</sup> | $k_1$ /min <sup>-1</sup> | R <sup>2</sup> | cal. $q_e$<br>/mg·g <sup>-1</sup> | $k_2$ /g·<br>mg <sup>-1</sup> ·min <sup>-1</sup> | R <sup>2</sup> |
| TpBD-Me <sub>2</sub>    | 80.77                             | 74.34                             | 0.004                    | 0.969          | 81.95                             | 6.316E-5                                         | 0.995          |
| TpBD-(OMe) <sub>2</sub> | 95.61                             | 88.70                             | 0.005                    | 0.965          | 97.10                             | 6.441E-5                                         | 0.993          |

**Table S5** Summary of the experimental values of  $q_e^{uc}$  (exp.  $q_e^{uc}$ ) of TpBD-Me<sub>2</sub> and TpBD-(OMe)<sub>2</sub> obtained by 72 h adsorption of I<sub>2</sub> in cyclohexane at initial concentration of 100.25 mg·L<sup>-1</sup> and the calculated value of  $q_e^{uc}$  (cal.  $q_e^{uc}$ ) from fitting of their adsorption kinetics profiles according to pseudo-first-order or pseudo-second-order models. The kinetic parameters obtained by fitting according to pseudo-first-order or pseudo-second-order models are also listed in the Table S5.

| COFs                    | exp. $q_e^{uc}$<br>/g·mol <sup>-1</sup> | Pseudo-first-order model                |                          |                | Pseudo-second-order model               |                                                   |                |
|-------------------------|-----------------------------------------|-----------------------------------------|--------------------------|----------------|-----------------------------------------|---------------------------------------------------|----------------|
|                         |                                         | cal. $q_e^{uc}$<br>/g·mol <sup>-1</sup> | $k_1$ /min <sup>-1</sup> | R <sup>2</sup> | cal. $q_e^{uc}$<br>/g·mol <sup>-1</sup> | $k_2$ /mol·<br>g <sup>-1</sup> ·min <sup>-1</sup> | R <sup>2</sup> |
| TpBD-Me <sub>2</sub>    | 76.66                                   | 70.56                                   | 0.004                    | 0.969          | 77.78                                   | 6.655E-5                                          | 0.995          |
| TpBD-(OMe) <sub>2</sub> | 99.93                                   | 92.71                                   | 0.005                    | 0.965          | 101.48                                  | 6.163 E-5                                         | 0.993          |

**Table S6** Summary of the values of  $q_t^{N+CO}$  of TpBD-Me<sub>2</sub> and  $q_t^{N+O}$ ,  $q_t^{EO}$  of TpBD-(OMe)<sub>2</sub> obtained during 72 h (4320 min) adsorption of I<sub>2</sub> in cyclohexane.

| Time<br>/ min | TpBD-Me <sub>2</sub>                      | TpBD-(OMe) <sub>2</sub>                  |                                         |
|---------------|-------------------------------------------|------------------------------------------|-----------------------------------------|
|               | $q_t^{N+CO}/\text{g}\cdot\text{mol}^{-1}$ | $q_t^{N+O}/\text{g}\cdot\text{mol}^{-1}$ | $q_t^{EO}/\text{g}\cdot\text{mol}^{-1}$ |
| 1             | 0.045                                     | 0.048                                    | 0.003                                   |
| 5             | 0.26                                      | 0.86                                     | 0.60                                    |
| 10            | 1.00                                      | 1.63                                     | 0.63                                    |
| 15            | 1.30                                      | 2.11                                     | 0.81                                    |
| 20            | 1.70                                      | 2.63                                     | 0.93                                    |
| 30            | 2.09                                      | 3.40                                     | 1.31                                    |
| 40            | 2.65                                      | 4.07                                     | 1.42                                    |
| 60            | 3.35                                      | 4.88                                     | 1.53                                    |
| 80            | 4.00                                      | 5.70                                     | 1.70                                    |
| 90            | 4.30                                      | 6.41                                     | 2.11                                    |
| 120           | 5.09                                      | 7.37                                     | 2.28                                    |
| 150           | 5.69                                      | 7.85                                     | 2.16                                    |
| 180           | 6.26                                      | 8.57                                     | 2.31                                    |
| 240           | 7.00                                      | 9.43                                     | 2.43                                    |
| 300           | 7.56                                      | 10.82                                    | 3.26                                    |
| 360           | 8.04                                      | 11.44                                    | 3.4                                     |
| 480           | 8.82                                      | 12.20                                    | 3.38                                    |
| 600           | 9.39                                      | 13.11                                    | 3.72                                    |
| 1440          | 11.43                                     | 15.27                                    | 3.84                                    |
| 1800          | 11.69                                     | 15.60                                    | 3.91                                    |
| 2880          | 12.34                                     | 16.32                                    | 3.98                                    |
| 3240          | 12.47                                     | 16.41                                    | 3.94                                    |
| 4320          | 12.78                                     | 16.66                                    | 3.88                                    |

**Table S7** Summary of the values of  $q_e^{N+CO}$  (exp.  $q_e^{N+CO}$ ) of TpBD-Me<sub>2</sub> and the values of  $q_e^{N+O}$  and  $q_e^{EO}$  (exp.  $q_e^{N+O}$ ,  $q_e^{EO}$ ) of TpBD-(OMe)<sub>2</sub> obtained by 72 h adsorption of I<sub>2</sub> in cyclohexane at initial concentration of 100.25 mg·L<sup>-1</sup> and the calculated value of  $q_e^{N+CO}$ ,  $q_e^{N+O}$  and  $q_e^{EO}$  (cal.  $q_e^{N+CO}$ ,  $q_e^{N+O}$  and  $q_e^{EO}$ ) from fitting of their adsorption kinetics profiles according to pseudo-first-order or pseudo-second-order models. The kinetic parameters obtained by fitting according to pseudo-first-order or pseudo-second-order models are also listed in the Table S7.

| COFs         | exp. $q_e^{uc}$<br>/g·mol <sup>-1</sup> | Pseudo-first-order model |                          |       | Pseudo-second-order model |                                                   |       |
|--------------|-----------------------------------------|--------------------------|--------------------------|-------|---------------------------|---------------------------------------------------|-------|
|              |                                         | cal. $q_e^{uc}$          | $k_1$ /min <sup>-1</sup> | $R^2$ | cal. $q_e^{uc}$           | $k_2$ /mol·<br>g <sup>-1</sup> ·min <sup>-1</sup> | $R^2$ |
|              |                                         | /g·mol <sup>-1</sup>     |                          |       | /g·mol <sup>-1</sup>      |                                                   |       |
| $q_e^{N+CO}$ | 12.78                                   | 11.76                    | 0.004                    | 0.969 | 12.96                     | 4.004E-4                                          | 0.995 |
| $q_e^{N+O}$  | 16.66                                   | 15.45                    | 0.005                    | 0.965 | 16.91                     | 3.698 E-4                                         | 0.993 |
| $q_e^{EO}$   | 3.88                                    | 3.75                     | 0.007                    | 0.931 | 4.03                      | 0.003                                             | 0.967 |

**Table S8** Summary of the  $q_e$  (mg·g<sup>-1</sup>),  $q_e^{uc}$  (g·mol<sup>-1</sup>) and  $q_e^{Mol}$  values of TpBD-Me<sub>2</sub> and TpBD-(OMe)<sub>2</sub> COFs obtained by 72 h adsorption of I<sub>2</sub> in cyclohexane at different initial I<sub>2</sub> concentrations ( $C_{I_2}^0$ , mg·L<sup>-1</sup>).

| $C_{I_2}^0$ /<br>mg·L <sup>-1</sup> | TpBD-Me <sub>2</sub>      |                                 |             | TpBD-(OMe) <sub>2</sub>   |                                 |             |
|-------------------------------------|---------------------------|---------------------------------|-------------|---------------------------|---------------------------------|-------------|
|                                     | $q_e$ /mg·g <sup>-1</sup> | $q_e^{uc}$ /g·mol <sup>-1</sup> | $q_e^{Mol}$ | $q_e$ /mg·g <sup>-1</sup> | $q_e^{uc}$ /g·mol <sup>-1</sup> | $q_e^{Mol}$ |
| 100.25                              | 80.77                     | 76.66                           | 0.302       | 95.61                     | 99.93                           | 0.394       |
| 201.13                              | 134.95                    | 128.09                          | 0.505       | 170.94                    | 178.66                          | 0.704       |
| 500.5                               | 277.72                    | 263.60                          | 1.039       | 333.77                    | 348.84                          | 1.374       |
| 821.34                              | 389.22                    | 369.43                          | 1.456       | 451.86                    | 472.26                          | 1.861       |
| 998.02                              | 433.79                    | 411.73                          | 1.622       | 518.95                    | 542.38                          | 2.137       |
| 1505.58                             | 533.10                    | 505.99                          | 1.994       | 643.54                    | 672.60                          | 2.650       |

**Table S9** Summary of the fitting results of I<sub>2</sub> adsorption isotherms in terms of  $q_e$  (mg·g<sup>-1</sup>) of TpBD-Me<sub>2</sub> and TpBD-(OMe)<sub>2</sub> in cyclohexane obtained by Table S8 according to Langmuir and Freundlich models.

| COFs                    | Langmuir model      |                     |       | Freundlich model                                      |                     |       |
|-------------------------|---------------------|---------------------|-------|-------------------------------------------------------|---------------------|-------|
|                         | $q_m$               | $K_L$               | $R^2$ | $K_F$                                                 | $1/n$               | $R^2$ |
|                         | /mg·g <sup>-1</sup> | /L·mg <sup>-1</sup> |       | /mg <sup>1-1/n</sup> g <sup>-1</sup> L <sup>1/n</sup> | /mg·L <sup>-1</sup> |       |
| TpBD-Me <sub>2</sub>    | 681.67              | 0.003               | 0.982 | 20.97                                                 | 0.474               | 0.992 |
| TpBD-(OMe) <sub>2</sub> | 728.77              | 0.006               | 0.921 | 45.98                                                 | 0.390               | 0.998 |

**Table S10** Summary of the fitting results of I<sub>2</sub> adsorption isotherms in terms of  $q_e^{uc}$  (g·mol<sup>-1</sup>) of TpBD-Me<sub>2</sub> and TpBD-(OMe)<sub>2</sub> in cyclohexane obtained by Table S8 according to Langmuir and Freundlich models.

| COFs                    | Langmuir model       |                     |       | Freundlich model   |                     |       |
|-------------------------|----------------------|---------------------|-------|--------------------|---------------------|-------|
|                         | $q_m^{uc}$           | $K_L$               | $R^2$ | $K_F$              | $1/n$               | $R^2$ |
|                         | /g·mol <sup>-1</sup> | /L·mg <sup>-1</sup> |       | /gL <sup>1/n</sup> | /mg·L <sup>-1</sup> |       |
| TpBD-Me <sub>2</sub>    | 646.99               | 0.003               | 0.982 | 19.90              | 0.474               | 0.992 |
| TpBD-(OMe) <sub>2</sub> | 761.68               | 0.006               | 0.921 | 48.06              | 0.390               | 0.998 |

**Table S11** Summary of the element atomic concentration of TpBD-Me<sub>2</sub>@I<sub>2</sub> and TpBD-(OMe)<sub>2</sub>@I<sub>2</sub> after iodine adsorption derived from the results of survey XPS spectra in Figure S17.

| COFs                                    | C      | O      | N     | I     |
|-----------------------------------------|--------|--------|-------|-------|
| TpBD-Me <sub>2</sub> @I <sub>2</sub>    | 69.26% | 24.48% | 5.7%  | 0.56% |
| TpBD-(OMe) <sub>2</sub> @I <sub>2</sub> | 65.36% | 30.17% | 3.65% | 0.82% |

**Table S12** Summary of I<sub>2</sub> adsorption capacity of reported porous materials in organic solvent.

| Types | Porous materials                                                                                                                        | adsorption capacity / mg·g <sup>-1</sup> | Reference |
|-------|-----------------------------------------------------------------------------------------------------------------------------------------|------------------------------------------|-----------|
| MOFs  | UiO-66-PYDC                                                                                                                             | 1250                                     | S1        |
|       | [Cu <sub>3</sub> (μ <sub>2</sub> -O) <sub>2</sub> (p-tr <sub>2</sub> Ph) <sub>2</sub> (HCOO)] [NO <sub>3</sub> ]·3DMF·3H <sub>2</sub> O | 1150                                     | S2        |
|       | Th-BDAT                                                                                                                                 | 1046                                     | S3        |
|       | [Eu <sub>2</sub> (TATAB) <sub>2</sub> ]·xDMF·yH <sub>2</sub> O                                                                          | 758.72                                   | S4        |
|       | Lac-Zn                                                                                                                                  | 755                                      | S5        |
|       | Th-TATAB                                                                                                                                | 750                                      | S6        |
|       | [Cu <sub>2</sub> (TBDA-Cl) (H <sub>2</sub> O)·10DMF·30H <sub>2</sub> O] <sub>n</sub>                                                    | 548.2                                    | S7        |
|       | Th-TTHA                                                                                                                                 | 528                                      | S8        |
|       | [Co <sub>2</sub> (H <sub>2</sub> BATD)(DMF) <sub>2</sub> ]·2.5DMF·0.5H <sub>2</sub> O                                                   | 480.99                                   | S9        |
|       | Th-SINAP-8                                                                                                                              | 473                                      | S10       |
|       | SCNU-Z5                                                                                                                                 | 442                                      | S11       |
|       | UiO-66                                                                                                                                  | 401                                      | S1        |
|       | NS-1                                                                                                                                    | 320.5                                    | S12       |
|       | MIL-101-NH <sub>2</sub>                                                                                                                 | 311                                      | S13       |
|       | Th-UiO-66-(NH <sub>2</sub> ) <sub>2</sub>                                                                                               | 300                                      | S14       |
|       | SCNU-Z4                                                                                                                                 | 237                                      | S15       |
|       | NUC-3                                                                                                                                   | 212.04                                   | S16       |
|       | MOF-5                                                                                                                                   | 155                                      | S17       |
|       | [Cd (nds) (bimh) <sub>2</sub> ·(bimh)] <sub>n</sub>                                                                                     | 148.5                                    | S18       |
|       | U-TATAB                                                                                                                                 | 146.72                                   | S19       |
|       | CuAceAd crystals                                                                                                                        | 144                                      | S20       |
|       | MIL-101(Cr)                                                                                                                             | 69.8                                     | S21       |
| POPs  | Azo-Car-CF <sub>3</sub>                                                                                                                 | 1198.00                                  | S22       |
|       | DTC-OP2                                                                                                                                 | 915.19                                   | S23       |



|      |                               |               |                  |
|------|-------------------------------|---------------|------------------|
|      | TTDP-3                        | 784           | S24              |
|      | TTDP-2                        | 694.8         | S24              |
|      | TTDP-1                        | 682.6         | S24              |
|      | P-TzTz                        | 568.28        | S25              |
|      | DTC-OP3                       | 528.45        | S23              |
|      | TPAPyD-CMP                    | 333.8         | S26              |
|      | NiP-CMP                       | 326           | S27              |
|      | TPFM                          | 293.3         | S28              |
|      | NRPOP-1                       | 285.7         | S29              |
|      | POBI                          | 239           | S30              |
|      | NRPOP-2                       | 212.8         | S29              |
| COFs | P-COFs                        | 1295.20       | S31              |
|      | PA-TT COF                     | 750           | S32              |
|      | <b>TpBD-(OMe)<sub>2</sub></b> | <b>728.77</b> | <b>This work</b> |
|      | TpPa                          | 727.64        | S33              |
|      | <b>TpBD-Me<sub>2</sub></b>    | <b>681.67</b> | <b>This work</b> |
|      | TpPa-CuCl <sub>2</sub>        | 674.48        | S33              |
|      | DaTd-COF                      | 666.79        | S34              |
|      | Cu <sub>x</sub> Pc-COFs       | 492.27        | S35              |
|      | Hz-COF                        | 173           | S36              |
|      | Tfp-BD                        | 99.9          | S37              |
|      | TFB-BD                        | 99.9          | S38              |

**Table S13** Summary of the values of  $Q_t$ ,  $Q_t^{uc}$  of TpBD-Me<sub>2</sub> and TpBD-(OMe)<sub>2</sub> obtained during 72 h (4320 min) adsorption of I<sub>3</sub><sup>-</sup> in KI/I<sub>2</sub> aqueous solution.

| Time /<br>min | TpBD-Me <sub>2</sub>              |                                        | TpBD-(OMe) <sub>2</sub>           |                                        |
|---------------|-----------------------------------|----------------------------------------|-----------------------------------|----------------------------------------|
|               | $Q_t/\text{mg}\cdot\text{g}^{-1}$ | $Q_t^{uc}/\text{mg}\cdot\text{g}^{-1}$ | $Q_t/\text{mg}\cdot\text{g}^{-1}$ | $Q_t^{uc}/\text{mg}\cdot\text{g}^{-1}$ |
| 1             | 0.82                              | 0.78                                   | 5.1                               | 5.33                                   |
| 5             | 6.88                              | 6.53                                   | 13.42                             | 14.03                                  |
| 10            | 13.14                             | 12.47                                  | 20.16                             | 21.07                                  |
| 20            | 17.50                             | 16.61                                  | 24.12                             | 25.21                                  |
| 30            | 24.32                             | 23.08                                  | 28.76                             | 30.06                                  |
| 40            | 27.04                             | 25.67                                  | 34.48                             | 36.04                                  |
| 60            | 34.68                             | 32.92                                  | 40.40                             | 42.22                                  |
| 80            | 41.16                             | 39.07                                  | 45.52                             | 47.58                                  |

|      |        |        |        |        |
|------|--------|--------|--------|--------|
| 90   | 45.86  | 43.53  | 50.42  | 52.70  |
| 120  | 50.62  | 48.05  | 55.46  | 57.96  |
| 150  | 55.94  | 53.10  | 60.98  | 63.73  |
| 180  | 60.50  | 57.42  | 65.42  | 68.37  |
| 240  | 69.10  | 65.59  | 72.70  | 75.98  |
| 300  | 73.38  | 69.65  | 79.52  | 83.11  |
| 360  | 80.40  | 76.31  | 85.32  | 89.17  |
| 480  | 88.58  | 84.08  | 92.66  | 96.84  |
| 600  | 93.82  | 89.05  | 100.10 | 104.62 |
| 1440 | 111.62 | 105.94 | 117.18 | 122.47 |
| 1800 | 115.9  | 110.01 | 120.48 | 125.92 |
| 2880 | 121.78 | 115.59 | 124.08 | 129.68 |
| 3240 | 122.78 | 116.54 | 124.7  | 130.33 |
| 4320 | 123.68 | 117.39 | 125.18 | 130.83 |

**Table S14** Summary of the experimental values of  $Q_e$  (exp.  $Q_e$ ) of TpBD-Me<sub>2</sub> and TpBD-(OMe)<sub>2</sub> obtained by 72 h adsorption of I<sub>3</sub><sup>-</sup> in KI/I<sub>2</sub> aqueous solution at initial concentration of 66.73 mg·L<sup>-1</sup> of I<sub>2</sub> and the calculated value of  $Q_e$  (cal.  $Q_e$ ) from fitting of their adsorption kinetics profiles according to pseudo-first-order or pseudo-second-order models. The kinetic parameters obtained by fitting according to pseudo-first-order or pseudo-second-order models are also listed in the Table S14.

| COFs                    | exp.                         | Pseudo-first-order model          |                          |                | Pseudo-second-order model         |                          |                |
|-------------------------|------------------------------|-----------------------------------|--------------------------|----------------|-----------------------------------|--------------------------|----------------|
|                         | $Q_e$<br>/mg·g <sup>-1</sup> | cal. $Q_e$<br>/mg·g <sup>-1</sup> | $k_1$ /min <sup>-1</sup> | R <sup>2</sup> | cal. $Q_e$<br>/mg·g <sup>-1</sup> | $k_2$ /min <sup>-1</sup> | R <sup>2</sup> |
| TpBD-Me <sub>2</sub>    | 123.68                       | 115.21                            | 0.004                    | 0.961          | 126.48                            | 4.343E-5                 | 0.992          |
| TpBD-(OMe) <sub>2</sub> | 125.18                       | 117.01                            | 0.005                    | 0.938          | 127.36                            | 5.249E-5                 | 0.979          |

**Table S15** Summary of the experimental values of  $Q_e^{uc}$  (exp.  $Q_e^{uc}$ ) of TpBD-Me<sub>2</sub> and TpBD-(OMe)<sub>2</sub> obtained by 72 h adsorption of I<sub>3</sub><sup>-</sup> in KI/I<sub>2</sub> aqueous solution at initial concentration of 66.73 mg·L<sup>-1</sup> of I<sub>2</sub> and the calculated value of  $Q_e^{uc}$  (cal.  $Q_e^{uc}$ ) from fitting of their adsorption kinetics profiles according to pseudo-first-order or pseudo-second-order models. The kinetic parameters obtained by fitting according to pseudo-first-order or pseudo-second-order models are also listed in the Table S15.

| COFs                    | exp.                              | Pseudo-first-order model          |                       |       | Pseudo-second-order model        |                                                            |       |
|-------------------------|-----------------------------------|-----------------------------------|-----------------------|-------|----------------------------------|------------------------------------------------------------|-------|
|                         | $Q_e^{uc}$                        | cal. $Q_e$                        | $k_1/\text{min}^{-1}$ | $R^2$ | cal. $Q_e$                       | $k_2/\text{mol} \cdot \text{g}^{-1} \cdot \text{min}^{-1}$ | $R^2$ |
|                         | $/\text{g} \cdot \text{mol}^{-1}$ | $/\text{g} \cdot \text{mol}^{-1}$ |                       |       | $/\text{mg} \cdot \text{g}^{-1}$ |                                                            |       |
| TpBD-Me <sub>2</sub>    | 117.39                            | 109.35                            | 0.004                 | 0.961 | 120.05                           | 4.576E-5                                                   | 0.991 |
| TpBD-(OMe) <sub>2</sub> | 130.83                            | 122.30                            | 0.005                 | 0.938 | 133.10                           | 5.023E-5                                                   | 0.979 |

**Table S16** Summary of the  $Q_e$  ( $\text{mg} \cdot \text{g}^{-1}$ ) and  $Q_e^{uc}$  ( $\text{g} \cdot \text{mol}^{-1}$ ) values of TpBD-Me<sub>2</sub> and TpBD-(OMe)<sub>2</sub> obtained by 72 h adsorption of I<sub>3</sub><sup>-</sup> in KI/I<sub>2</sub> aqueous solution at different initial I<sub>2</sub> concentrations ( $C_{I_2}^0$ ,  $\text{mg} \cdot \text{L}^{-1}$ ).

| $C_{I_2}^0$ | TpBD-Me <sub>2</sub>                |                                           | TpBD-(OMe) <sub>2</sub>             |                                           |
|-------------|-------------------------------------|-------------------------------------------|-------------------------------------|-------------------------------------------|
|             | $Q_e/\text{mg} \cdot \text{g}^{-1}$ | $Q_e^{uc}/\text{g} \cdot \text{mol}^{-1}$ | $Q_e/\text{mg} \cdot \text{g}^{-1}$ | $Q_e^{uc}/\text{g} \cdot \text{mol}^{-1}$ |
| 66.73       | 123.68                              | 117.39                                    | 125.18                              | 130.83                                    |
| 142.52      | 216.94                              | 205.91                                    | 225.80                              | 235.99                                    |
| 214.82      | 300.18                              | 284.92                                    | 322.48                              | 337.04                                    |
| 396.51      | 468.24                              | 444.43                                    | 515.96                              | 539.26                                    |
| 700.72      | 703.24                              | 667.48                                    | 759.80                              | 794.10                                    |

**Table S17** Summary of the fitting results of I<sub>2</sub> adsorption isotherms in terms of  $Q_e$  ( $\text{mg} \cdot \text{g}^{-1}$ ) of TpBD-Me<sub>2</sub> and TpBD-(OMe)<sub>2</sub> COFs in KI/I<sub>2</sub> aqueous solution obtained by Table S16 according to Langmuir and Freundlich models.

| COFs                    | Langmuir model                   |                                  |       | Freundlich model                                        |                                  |       |
|-------------------------|----------------------------------|----------------------------------|-------|---------------------------------------------------------|----------------------------------|-------|
|                         | $Q_m$                            | $K_L$                            | $R^2$ | $K_F$                                                   | $1/n$                            | $R^2$ |
|                         | $/\text{mg} \cdot \text{g}^{-1}$ | $/\text{L} \cdot \text{mg}^{-1}$ |       | $/\text{mg}^{1-1/n} \cdot \text{g}^{-1} \text{L}^{1/n}$ | $/\text{mg} \cdot \text{L}^{-1}$ |       |
| TpBD-Me <sub>2</sub>    | 939.56                           | 0.007                            | 0.925 | 41.44                                                   | 0.481                            | 0.990 |
| TpBD-(OMe) <sub>2</sub> | 997.13                           | 0.009                            | 0.948 | 49.77                                                   | 0.472                            | 0.993 |

**Table S18** Summary of the fitting results of I<sub>2</sub> adsorption isotherms in terms of  $Q_e^{uc}$  ( $\text{g} \cdot \text{mol}^{-1}$ ) of TpBD-Me<sub>2</sub> and TpBD-(OMe)<sub>2</sub> COFs in KI/I<sub>2</sub> aqueous solution obtained by Table S16 according to Langmuir and Freundlich models.

| COFs                    | Langmuir model       |                     |       | Freundlich model   |                     |       |
|-------------------------|----------------------|---------------------|-------|--------------------|---------------------|-------|
|                         | $Q_m^{uc}$           | $K_L$               | $R^2$ | $K_F$              | $1/n$               | $R^2$ |
|                         | /g·mol <sup>-1</sup> | /L·mg <sup>-1</sup> |       | /gL <sup>1/n</sup> | /mg·L <sup>-1</sup> |       |
| TpBD-Me <sub>2</sub>    | 891.77               | 0.007               | 0.925 | 39.34              | 0.481               | 0.990 |
| TpBD-(OMe) <sub>2</sub> | 1042.15              | 0.009               | 0.948 | 52.02              | 0.472               | 0.993 |

**Table S19** Summary of the element atomic concentration of TpBD-Me<sub>2</sub>@I<sub>3</sub><sup>-</sup> and TpBD-(OMe)<sub>2</sub>@I<sub>3</sub><sup>-</sup> after I<sub>3</sub><sup>-</sup> adsorption derived from the results of survey XPS spectra in Figure S21.

| COFs                                                 | C      | O      | N     | I     |
|------------------------------------------------------|--------|--------|-------|-------|
| TpBD-Me <sub>2</sub> @I <sub>3</sub> <sup>-</sup>    | 79.8%  | 11.02% | 8.13% | 1.05% |
| TpBD-(OMe) <sub>2</sub> @I <sub>3</sub> <sup>-</sup> | 80.79% | 11.93% | 5.76% | 1.52% |

## References

- [S1] Wang, Z.; Huang, Y.; Yang, J.; Li, Y.; Zhuang, Q.; Gu, J. The Water-Based Synthesis of Chemically Stable Zr-Based MOFs Using Pyridine-Containing Ligands and Their Exceptionally High Adsorption Capacity for Iodine. *Dalton Trans.* **2017**, 46, 7412-7420.
- [S2] Xu, T.; Li, J.; Jia, M.; Li, G.; Liu, Y. Contiguous Layer Based Metal–Organic Framework with Conjugated  $\pi$ -Electron Ligand for High Iodine Capture. *Dalton Trans.* **2021**, 50, 13096-13102.
- [S3] Ju, Y.; Li, Z.; Qiu, J.; Li, X.; Yang, J.; Zhang, Z.; He, M.; Wang, J.; Lin, J. Adsorption and Detection of Iodine Species by a Thorium-Based Metal–Organic Framework. *Inorg. Chem.* **2023**, 62, 8158-8165.
- [S4] Zhao, Y.; Zhang, N.; Wang, Y.; Bai, F.; Xing, Y.; Sun, L. Ln-MOFs with Window-Shaped Channels Based on Triazine Tricarboxylic Acid as a Linker for the Highly Efficient Capture of Cationic Dyes and Iodine. *Inorg. Chem. Front.* **2021**, 8, 1736-1746.
- [S5] Xu, L.; Zheng, Q.; Wang, Y.; Jiang, L.; Jiang, J.; Qiu, J. A Pillared Double-Wall Metal-Organic Framework Adsorption Membrane for the Efficient Removal of Iodine from Solution *Sep. Purif. Technol.* **2021**, 274, 118436.
- [S6] Zhang, N.; Sun, L.; Xing, Y.; Bai, F. A Double-Walled Thorium-Based Metal–Organic Framework as a Promising Dual-Function Absorbent for Efficiently Capturing Iodine and Dyes *Cryst. Growth Des.* **2019**, 19, 5686-5695.
- [S7] Cai, H.; Zeng, G.; You, Z.; Wang, C.; Sun, L.; Bai, F.; Xing, Y. Cu(II) and Zn(II) Frameworks Constructed by Directional Tuning of Diverse Substituted Groups on a Triazine Skeleton and Supermassive Adsorption Behavior for Iodine and Dyes. *Dalton Trans.* **2022**, 51, 5457-5470.
- [S8] Zhang, N.; Sun, L.; Bai, F.; Xing, Y. Thorium-Organic Framework Constructed with a Semirigid Triazine Hexacarboxylic Acid Ligand: Unique Structure with Thorium Oxide Wheel Clusters and Iodine Adsorption Behavior. *Inorg. Chem.* **2020**, 59, 3964-3973.
- [S9] Liu, M.; Cai, H.; Jiang, S.; Xing, Y.; Bai, F. Construction of a Triazine Polycarboxylate Co-MOF with Flexible and Rigid Coordination Arms as well as Excellent Catalytic Reduction and Adsorption Properties. *Dalton Trans.* **2023**, 52, 6773-6781.
- [S10] Li, Z.; Yue, Z.; Ju, Y.; Wu, X.; Ren, Y.; Wang, S.; Li, Y.; Zhang, Z.; Guo, X.; Lin, J. Ultrastable Thorium Metal–Organic Frameworks for Efficient Iodine Adsorption *Inorg. Chem.* **2020**, 59, 4435-4442.
- [S11] Huang, J.; Hu, H.; Deng, S.; Cai, S.; Fan, J.; Zhang, W.; Zheng, S. A Ni(II) metal–organic framework with helical channels for the capture of iodine via guest exchange induced amorphization. *New J Chem.* **2022**, 46, 7144-7152.

- [S12] Hu, H.; Chen, F.; Zhang, Z.; Liu, D.; Liang, Y.; Chen, Z. Heterometallic Metal-Organic Framework Based on [Cu<sub>4</sub>I<sub>4</sub>] and [Hf<sub>6</sub>O<sub>8</sub>] Clusters for Adsorption of Iodine. *Front. Chem.* **2022**, 10, 864131.
- [S13] Falaise, C.; Volkringer, C.; Facqueur, J.; Bousquet, T.; Gasnot, L.; Loiseau, T. Capture of Iodine in Highly Stable Metal – Organic Frameworks: a Systematic Study. *Chem. Commun.* **2013**, 49, 10320-10322.
- [S14] Li, Z.; Ju, Y.; Lu, H.; Wu, X.; Yu, X.; Li, Y.; Wu, X.; Zhang, Z.; Lin, J.; Qian, Y. Boosting the Iodine Adsorption and Radioresistance of Th-UiO-66 MOFs via Aromatic Substitution. *Chem. Eur. J.* **2020**, 27, 1286-1291.
- [S15] Wang, G.; Huang, J.; Huang, X.; Deng, S.; Zheng, S.; Cai, S.; Fan, J.; Zhang, W. A Hydrolytically Stable Cage-Based Metal–Organic Framework Containing two Types of Building Blocks for the Adsorption of Iodine and Dyes. *Inorg. Chem. Front.* **2021**, 8, 1083-1092.
- [S16] Chen, H.; Fan, L.; Zhang, X.; Ma, L. Robust Heterometallic Tb<sup>III</sup>/Mn<sup>II</sup>–Organic Framework for CO<sub>2</sub>/CH<sub>4</sub> Separation and I<sub>2</sub> Adsorption. *ACS Appl. Nano Mater.* **2020**, 3, 2680-2686.
- [S17] Yu, R.; Li, Q.; Zhang, T.; Li, Z.; Xia, L. Zn, O Co-Adsorption Based on MOF-5 for Efficient Capture of Radioactive Iodine. *Process Saf. Environ.* **2023**, 174, 770-777.
- [S18] Yang, Y.; Tu, C.; Shi, J.; Zhao, T.; Liu, Z.; Cheng, F.; Luo, F. Highly Stable Cd(II)-MOFs Based on 2,6-Naphthanlenedisulfonate and Bisimidazole Ligands: A New Platform for Selective Detection of Cu<sup>2+</sup> and Efficient Removal of Iodine. *J. Solid State Chem.* **2021**, 302, 122439.
- [S19] Zhang, N.; Xing, Y.; Bai, F. A Uranyl-Organic Framework Featuring Two-Dimensional Graphene-like Layered Topology for Efficient Iodine and Dyes Capture. *Inorg. Chem.* **2019**, 58, 6866-6876.
- [S20] Li, M.; Yuan, G.; Zeng, Y.; Yang, Y.; Liao, J.; Yang, J.; Liu, N. Flexible surface-supported MOF membrane via a convenient approach for efficient iodine adsorption. *J. Radioanal. Nucl. Ch.* **2020**, 324, 1167-1177.
- [S21] Al Lafi, A. G.; Assfour, B.; Assaad, T. Metal Organic Framework MIL-101(Cr): Spectroscopic Investigations to Reveal Iodine Capture Mechanism. *J. Inorg. Organomet. P.* **2020**, 30, 1218-1230.
- [S22] Li, L.; Sun, Z.; Yang, A.; Zhang, X.; Zhu, X.; Li, W.; Liu, Y.; Luan, J. A Novel Azo-Linked Polymer Bearing Trifluoromethyl Groups for I<sub>2</sub> Capture. *Macromol. Rapid Comm.* **2023**, 44, 2200982.
- [S23] Thurakkal, L.; Cheekatla, S.; Porel, M. Superfast Capture of Iodine from Air, Water, and Organic Solvent by Potential Dithiocarbamate-Based Organic Polymer. *Int. J. Mol. Sci.* **2023**, 24, 1466.
- [S24] Du, W.; Qin, Y.; Ni, C.; Dai, W.; Zou, J. Efficient Capture of Volatile Iodine by Thiophene-Containing Porous Organic Polymers. *ACS Appl. Polym. Mater.* **2020**, 2, 5121-5128.

- [S25] Pan, X.; Ding, C.; Zhang, Z.; Ke, H.; Cheng, G. Functional Porous Organic Polymer with High S and N for Reversible Iodine Capture. *Micropor. Mesopor. Mat.* **2020**, 300, 110161.
- [S26] Yang, X.; Duan, L.; Ran, X.; Ran, B.; Yi, S. Two Nitrogen-Rich Conjugated Microporous Polymers for Efficient Iodine Sequestration and Removal. *J. Polym. Res.* **2022**, 29, 499.
- [S27] Sigen, A.; Zhang, Y.; Li, Z.; Xia, H.; Xue, M.; Liu, X.; Mu, Y. Highly Efficient and Reversible Iodine Capture Using a Metalloporphyrin-Based Conjugated Microporous Polymer. *Chem. Commun.* **2014**, 50, 8495-8498.
- [S28] Liu, L.; Song, C.; Kong, A. Nitrogen and Sulfur-Enriched Porous Bithiophene-Melamine Covalent Organic Polymers for Effective Capture of CO<sub>2</sub> and Iodine. *Mater. Lett.* **2020**, 277, 128291.
- [S29] Mohan, A.; Al-Sayah, M. H.; Ahmed, A.; El-Kadri, O. M. Triazine-Based Porous Organic Polymers for Reversible Capture of Iodine and Utilization in Antibacterial Application. *Sci. Rep.* **2022**, 12, 2638.
- [S30] Yang, M.; Shi, W.; Liu, S.; Xu, K. Multifunctional Diphenyl Ether-Based, Cross-Linked Polyisocyanide for Efficient Iodine Capture and NO<sub>2</sub>/SO<sub>3</sub><sup>2-</sup> Electrochemical Probing. *Colloid. Surface. A* **2022**, 642, 128680.
- [S31] Li, Y.; Li, X.; Li, J.; Liu, W.; Cheng, G.; Ke, H. Phosphine-Based Covalent Organic Framework for Highly Efficient Iodine Capture. *Micropor. Mesopor. Mat.* **2021**, 325, 111351.
- [S32] Yan, X.; Yang, Y.; Li, G.; Zhang, J.; He, Y.; Wang, R.; Lin, Z.; Cai, Z. Thiophene-Based Covalent Organic Frameworks for Highly Efficient Iodine Capture. *Chinese Chem. Lett.* **2023**, 34, 107201.
- [S33] Jing, L.; Cheng, C.; Wang, B.; Wang, S.; Xie, R.; Xia, H.; Wang, D. Controlled Iodine Phase Transfer of Covalent Organic Framework Membranes for Instant but Sustained Disinfection. *Langmuir* **2023**, 39, 597-609.
- [S34] Wu, Z.; Wei, W.; Ma, J.; Luo, J.; Zhou, Y.; Zhou, Z.; Liu, S. Adsorption of Iodine on Adamantane-Based Covalent Organic Frameworks. *Chem. Select* **2021**, 6, 10141-10148.
- [S35] Liu, X.; Zhang, A.; Ma, R.; Wu, B.; Wen, T.; Ai, Y.; Sun, M.; Jin, J.; Wang, S.; Wang, X. Experimental and Theoretical Insights into Copper Phthalocyanine-Based Covalent Organic Frameworks for Highly Efficient Radioactive Iodine Capture. *Chinese Chem. Lett.* **2022**, 33, 3549-3555.
- [36] Mokhtari, N.; Dinari, M. Developing Novel Amine-Linked Covalent Organic Frameworks towards Reversible Iodine Capture. *Sep. Purif. Technol.* **2022**, 301, 121948.
- [S37] Song, S.; Shi, Y.; Liu, N.; Liu, F. C=N Linked Covalent Organic Framework for the Efficient Adsorption of Iodine in Vapor and Solution. *RSC Adv.* **2021**, 11, 10512-10523.
- [S38] Song, S.; Shi, Y.; Liu, N.; Liu, F. Theoretical Screening and Experimental Synthesis of Ultrahigh-Iodine Capture Covalent Organic Frameworks. *ACS Appl. Mater. Interfaces* **2021**, 13, 10513-10523.
